# Supplementary material for: A versatile sol–gel coating for mixed oxides on nanoporous gold and their application in the water gas shift reaction
Source: Royal Society of Chemistry journal article supplement (doi:10.1039/c5cy02205c), 2016-01-01
Supplement: c5cy02205c1.pdf [file c5cy02205c1.pdf]

## Supporting Information

### **A versatile sol-gel coating for mixed oxides on nanoporous gold and their application in the water gas shift reaction**

Junjie Shi<sup>1</sup>, Christoph Mahr<sup>2</sup>, M. Mangir Murshed<sup>3</sup>, Volkmar Zielasek<sup>1</sup>, Andreas Rosenauer<sup>2</sup>, Thorsten M. Gesing<sup>3</sup>, Marcus Bäumer<sup>1</sup>, and Arne Wittstock<sup>1\*</sup>

<sup>1</sup>*Institute of Applied and Physical Chemistry and Center for Environmental Research and Sustainable Technology, University Bremen, Bremen, Germany*

<sup>2</sup>*Institute of Solid State Physics, University Bremen, Bremen, Germany*

<sup>3</sup>*Solid State Chemical Crystallography, Institute of Inorganic Chemistry and Crystallography/FB02, University Bremen, Bremen, Germany*

<sup>1,2,3</sup>*MAPEX Center for Materials and Processes, University Bremen, Bremen, Germany*

\*Corresponding author: Leobener Strasse UFT, Bremen, Germany, Phone +49 421 218 63400 awittstock@uni-bremen.de

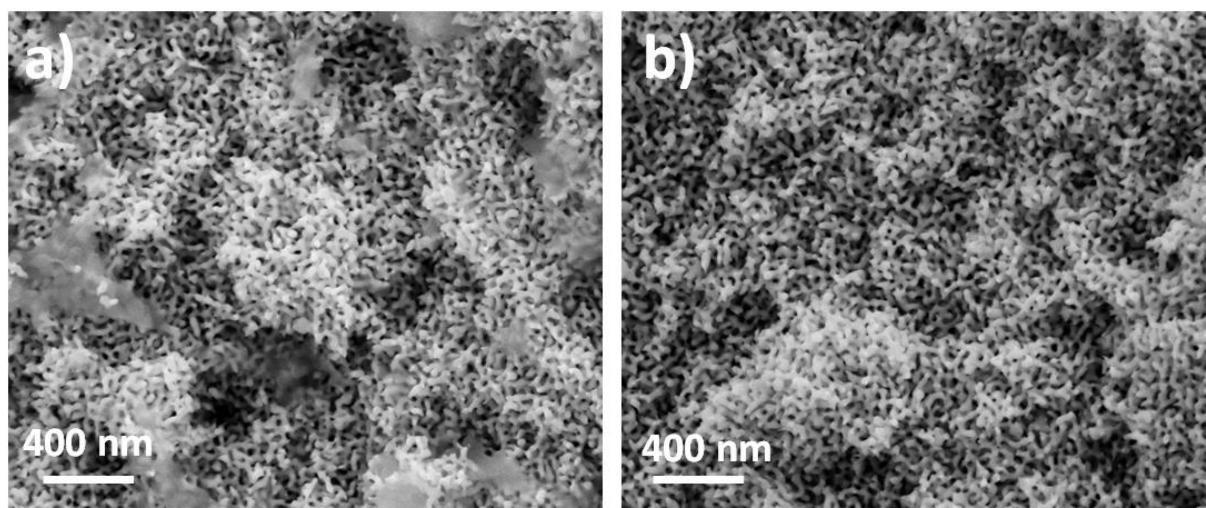

Figure S1: SEM characterization of titania modified nanoporous gold ( $\text{TiO}_2/\text{npAu}$ ). a) before annealing b) after annealing at 450° C for 2h.

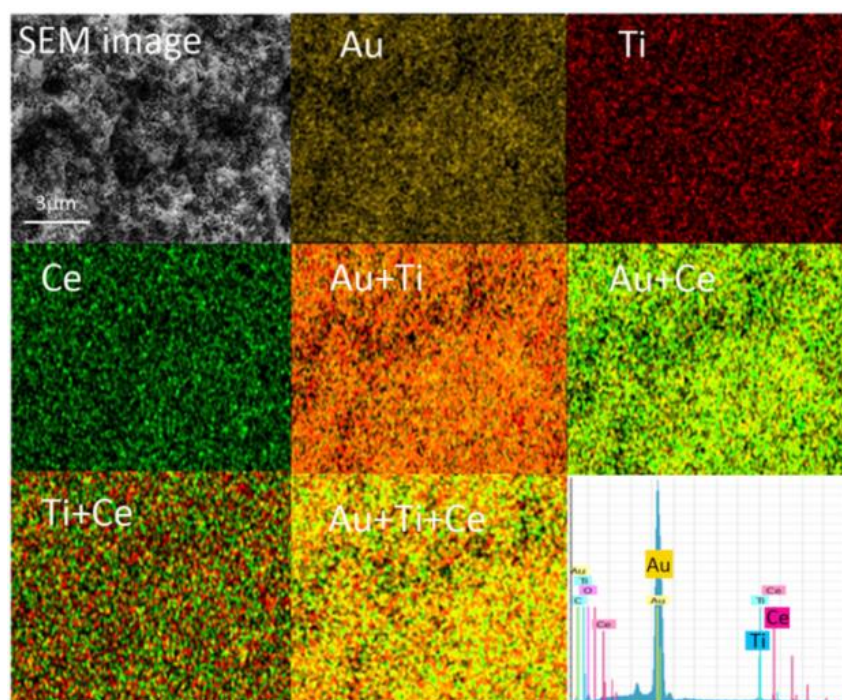

Figure S2: EDX elemental mapping images of Ti-CeO<sub>x</sub> mixed oxides modified npAu after annealing at 450°C for 2h.

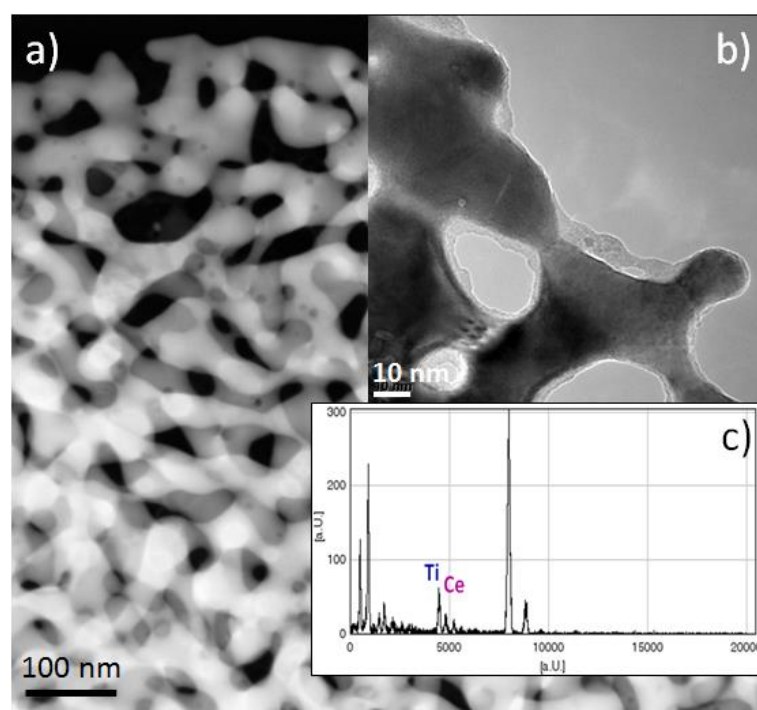

Figure S3: Selected a) STEM b) TEM c) EDX images of the titania-ceria mixed oxides modified nanoporous gold thin film (100 nm) after calcinations at 350°C for 2h.

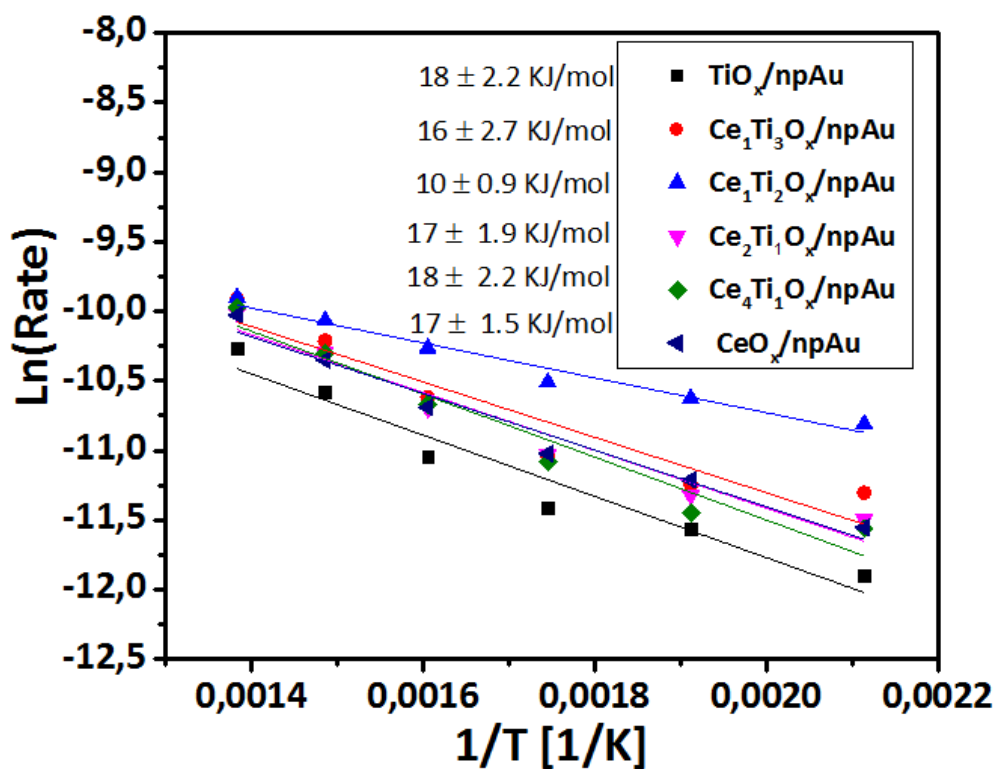

Figure S4. WGS activity ( $\text{CO} + \text{H}_2\text{O} \rightarrow \text{CO}_2 + \text{H}_2$ ): Comparison of the  $E_a$  values of different mixed Ce-TiO<sub>x</sub> and TiO<sub>2</sub>, CeO<sub>2</sub> single oxide functionalized np-Au samples (150  $\mu\text{m}$  thick). (5.8 vol% CO, 22.0 vol% H<sub>2</sub>O in He, total gas flow 32 mL/min,  $M_{\text{catal}} = 6.0 \pm 0.2 \text{ mg}$ , space velocity 320,000 mL h<sup>-1</sup>g<sup>-1</sup>cat).

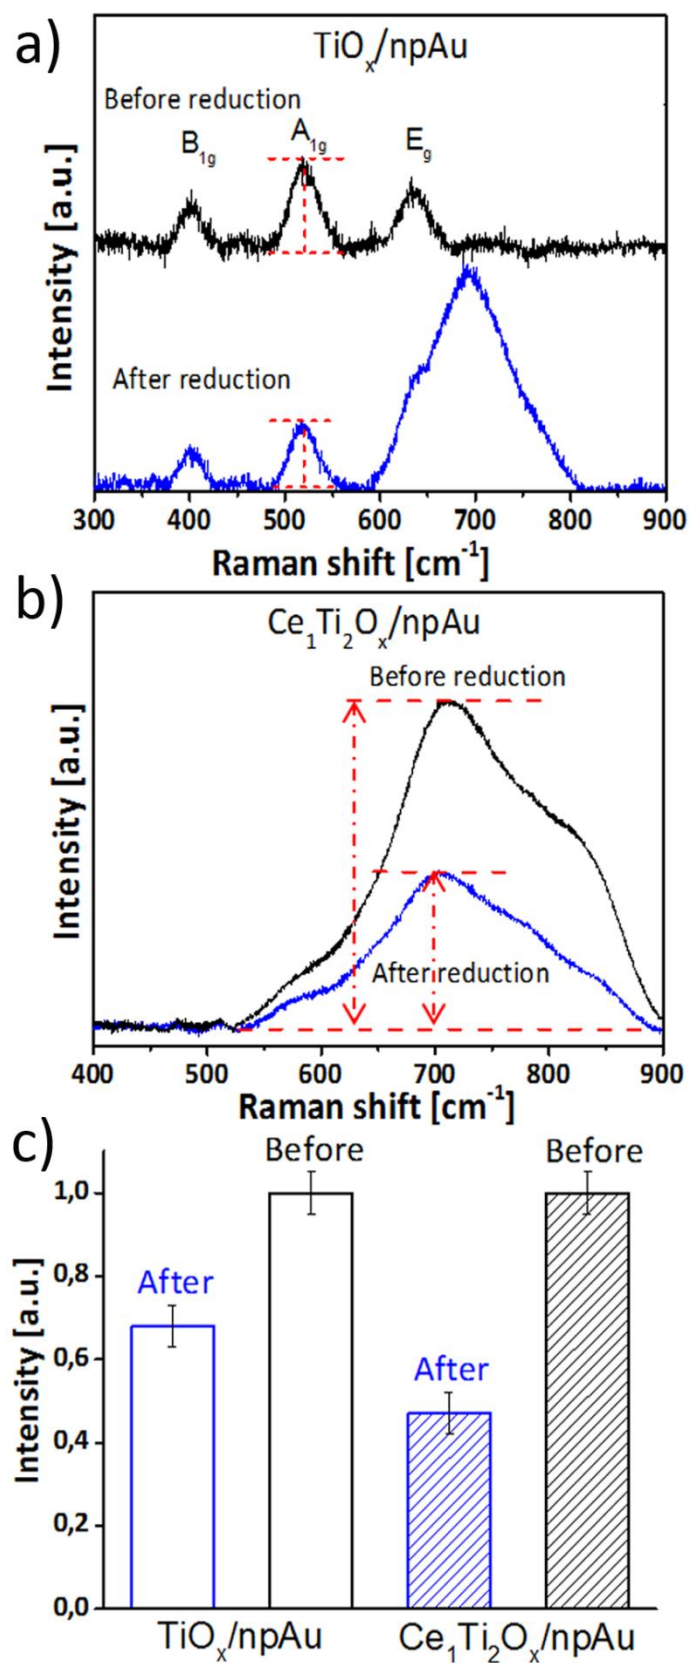

Figure S5: Raman spectra of a)  $\text{TiO}_x/\text{npAu}$ , b)  $\text{Ce}_1\text{Ti}_2\text{O}_x/\text{npAu}$  before and after CO reduction. After treating the sample in  $\text{O}_2$  atmosphere at 400 °C for 2h, broke the sample into two pieces. Then took part of the oxidized sample and reduced it under CO atmosphere at 400 °C for 2h. c) Compare the D peak's intensity change before and after CO reduction for  $\text{TiO}_x/\text{npAu}$  and  $\text{Ce}_1\text{Ti}_2\text{O}_x/\text{npAu}$ .

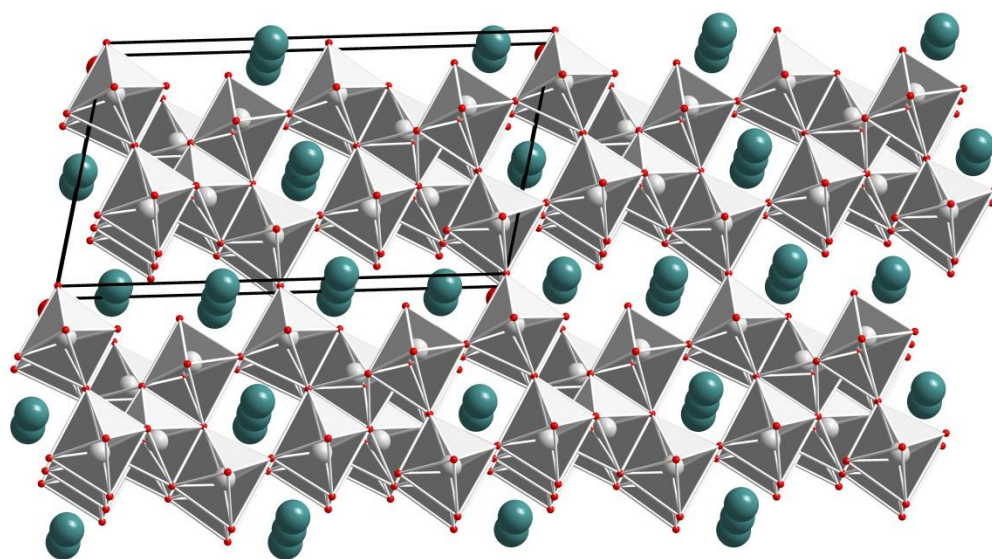

Figure S6: Crystal structure of Ce<sub>2</sub>Ti<sub>2</sub>O<sub>7</sub> (perovskite like structure), the black line represents the unit cell. Color code for atoms: red/oxygen, grey/titanium, green/cerium. (see also Gao et al., *J. Am. Ceram. Soc.*, 2015, 1-5). One can distinguish the layers of TiO<sub>6</sub> octaeders and the cerium atoms occupying interstitial sites.
